# Supplementary material for: Biological Studies of New Implant Materials Based on Carbon and Polymer Carriers with Film Heterostructures Containing Noble Metals
Source: MDPI journal article supplement (doi:10.3390/biomedicines10092230), 2022-09-08
Supplement: s1 [file s1]

# Biological studies of new implant materials based on carbon and polymer carriers with film heterostructures containing noble metals

Svetlana I. Dorovskikh<sup>1</sup>, Evgeniia S. Vikulova<sup>1</sup>, David S. Sergeevichev<sup>2</sup>, Tatyana Ya. Gusel'nikova<sup>1</sup>, Alexander A. Zheravin<sup>2</sup>, Dmitriy A. Nasimov<sup>3</sup>, Anatoliy I. Saprykin<sup>1</sup>, Tamara V. Basova<sup>1</sup>, Elena V. Chepeleva<sup>2</sup>, Maria B. Vasilieva<sup>2,4</sup>, Natalya B. Morozova<sup>1,\*</sup>

<sup>1</sup> Nikolaev Institute of Inorganic Chemistry SB RAS, 3 Lavrentiev Ave., Novosibirsk, 630090, Russia

<sup>2</sup> Meshalkin National medical research center» of the Ministry of Health of the Russian Federation, 15 Rechkunovskaya Str., Novosibirsk, 630055, Russia

<sup>3</sup> Rzhhanov Institute of Semiconductor Physics SB RAS, 13 Lavrentiev Ave., Novosibirsk, 630090, Russia

<sup>4</sup> Zelman Institute for the Medicine and Psychology, Novosibirsk State University, 1, Pirogov Str., 630090 Novosibirsk, Russia

\* Correspondence: mor@niic.nsc.ru; Tel.: +73833309556

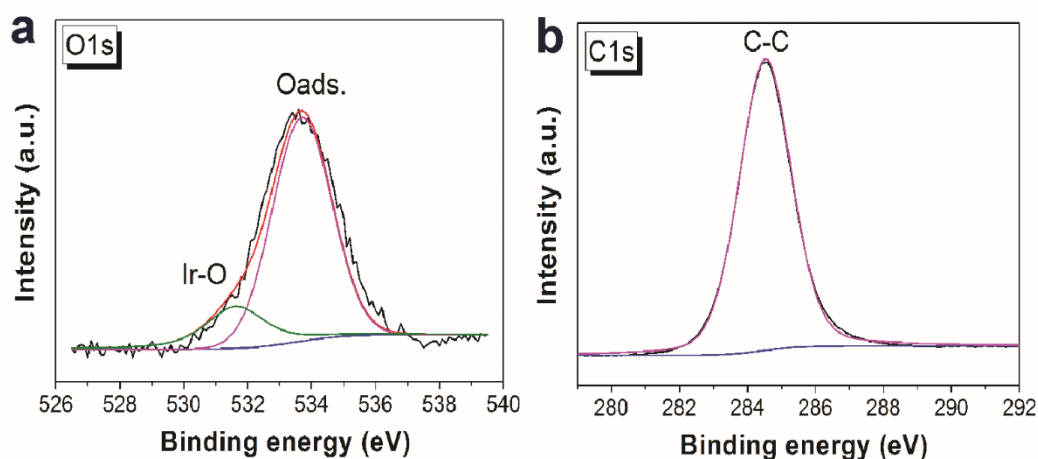

Figure S1. XPS spectra of Ir/CCM with fitting of O1s (a), C1s (b)

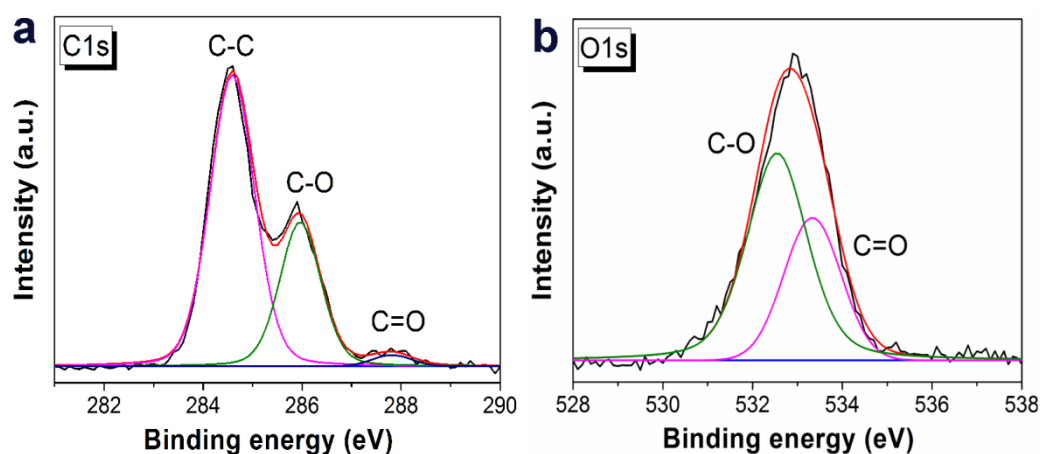

Figure S2. XPS spectra of Pt/CFR-PEEK with fitting of C1s (a), O1s (b)
